# Supplementary material
Source: publisher site journal article supplement (https://www.dovepress.com/article/242807)
Supplement: Supplementary file 1 [file get_supplementary_file.php]

Supplementary materials

Supplementary 1：

1. conventional MRI sequences for determining anatomical brain abnormalities and for the diagnosis of the lumbar
2. Axial T2-weighted sequence (repetition time (TR)/echo time (TE) = 3000 ms/122 ms, field of view (FOV) = 240mm × 240 mm, thickness/gap = 5.0/0 mm)
3. Axial T2-FLAIR sequence (repetition time (TR)/echo time (TE) = 3000 ms/122 ms, TI=2000 ms; field of view (FOV) = 240 mm × 240 mm, thickness/gap = 5.0/0 mm)
4. conventional MRI sequences for the diagnosis of the lumbar

(1)Sagittal T1-weighted sequence (repetition time (TR)/echo time (TE) = 530 ms/7.2ms, field of view (FOV) = 250 mm × 250 mm, thickness/gap = 3.0/0 mm)

(2)Axial T1-weighted sequence (repetition time (TR)/echo time (TE) = 1000 ms/8ms, field of view (FOV) = 80 mm × 80 mm, thickness/gap = 7.0/0 mm)

(3)Sagittal T2-weighted sequence (repetition time (TR)/echo time (TE) = 3314 ms/120 ms, field of view (FOV) = 250 mm × 250 mm, thickness/gap = 3.0/0 mm)

(4)Axial T2-weighted sequence (repetition time (TR)/echo time (TE) = 4000 ms/120 ms, field of view (FOV) = 80 mm × 80 mm, thickness/gap = 7.0/0 mm)

(5)T2-fat suppression sequence (repetition time (TR)/echo time (TE) = 2200 ms/44 ms, TI=230 ms; field of view (FOV) = 300 mm × 300 mm, thickness/gap = 3.0/0 mm)

Table S1. Partial correlation analysis between static functional connectivity coefficients and clinical index in LBLP patients.

| Brain regions  (sFC) |  | Right SFG and MFG (sFC of left S1back) | Right SFG and MFG (sFC of left S1chest) | Right SFG and MFG (sFC of right S1chest) | Right MFG (sFC of left S1face) | Right IPL(sFC of right S1face) |
| --- | --- | --- | --- | --- | --- | --- |
| Duration | p value  r value | 0.433  0.168 | 0.225  -0.257 | 0.092  -0.352 | 0.349  0.200 | 0.520  0.138 |
| Barthel | p value  r value | 0.928  0.020 | 0.470  0.155 | 0.978  0.006 | 0.391  -0.183 | 0.048  -0.408 |
| JOA | p value  r value | 0.502  0.144 | 0.503  0.144 | 0.888  0.030 | 0.688  -0.087 | 0.831  -0.046 |
| VAS | p value  r value | 0.886  0.031 | 0.389  -0.184 | 0.150  -0.303 | 0.420  0.173 | 0.886  0.031 |
| Fual-Meyer assessment | p value  r value | 0.781  0.060 | 0.271  -0.234 | 0.207  -0.267 | 0.974  0.007 | 0.651  0.097 |
| 2PD test  (right hand) | p value  r value | 0.499  0.145 | 0.676  -0.090 | 0.063  -0.385 | 0.438  0.166 | 0.566  0.123 |
| 2PD test  (left hand) | p value  r value | 0.958  -0.011 | 0.387  -0.185 | 0.147  -0.306 | 0.054  0.398 | 0.452  0.161 |
| 2PD test  (right foot) | p value  r value | 0.622  -0.106 | 0.126  -0.321 | 0.119  -0.327 | 0.143  0.308 | 0.183  0.281 |
| 2PD test  (left foot) | p value  r value | 0.202  -0.270 | 0.240  -0.250 | 0.221  -0.260 | 0.262  0.238 | 0.593  0.115 |

*Note: LBLP, low-back-related leg pain; sFC, static functional connectivity; SFG, superior frontal gyrus; MFG, middle frontal gyrus; IPL, inferior parietal lobule; 2PD, two-point tactile discrimination; JOA, the Japanese Orthopaedic Association Back Pain Evaluation questionnaire; VAS, Visual analogue scale;* S1back, *representation of the back in the primary somatosensory cortex.*

Table S2. Partial correlation analysis between dynamic functional connectivity coefficients and clinical index in LBLP patients.

| Brain regions  (dFC) |  | Left PRG and POG(dFC of right S1hand) | Right PRG and POG(dFC of right S1finger) |
| --- | --- | --- | --- |
| Duration | p value  r value | 0.963  -0.010 | 0.563  0.124 |
| Barthel | p value  r value | 0.810  -0.052 | 0.137  0.313 |
| JOA | p value  r value | 0.830  -0.046 | 0.115  0.330 |
| VAS | p value  r value | 0.310  -0.216 | 0.690  -0.086 |
| Fual-Meyer assessment | p value  r value | 0.184  0.280 | 0.243  0.248 |
| 2PD test  (right hand) | p value  r value | 0.705  -0.081 | 0.301  -0.220 |
| 2PD test  (left hand) | p value  r value | 0.475  -0.153 | 0.944  -0.015 |
| 2PD test  (right foot) | p value  r value | 0.291  0.225 | 0.781  -0.060 |
| 2PD test  (left foot) | p value  r value | 0.615  0.108 | 0.656  -0.096 |

*Note: LBLP, low-back-related leg pain; PRG, Precentral Gyrus; POG, Postcentral Gyrus; 2PD, two-point tactile discrimination; JOA, the Japanese Orthopaedic Association Back Pain Evaluation questionnaire; VAS, Visual analogue scale;* *S1hand,**representation of the hand in the primary somatosensory cortex.*

*
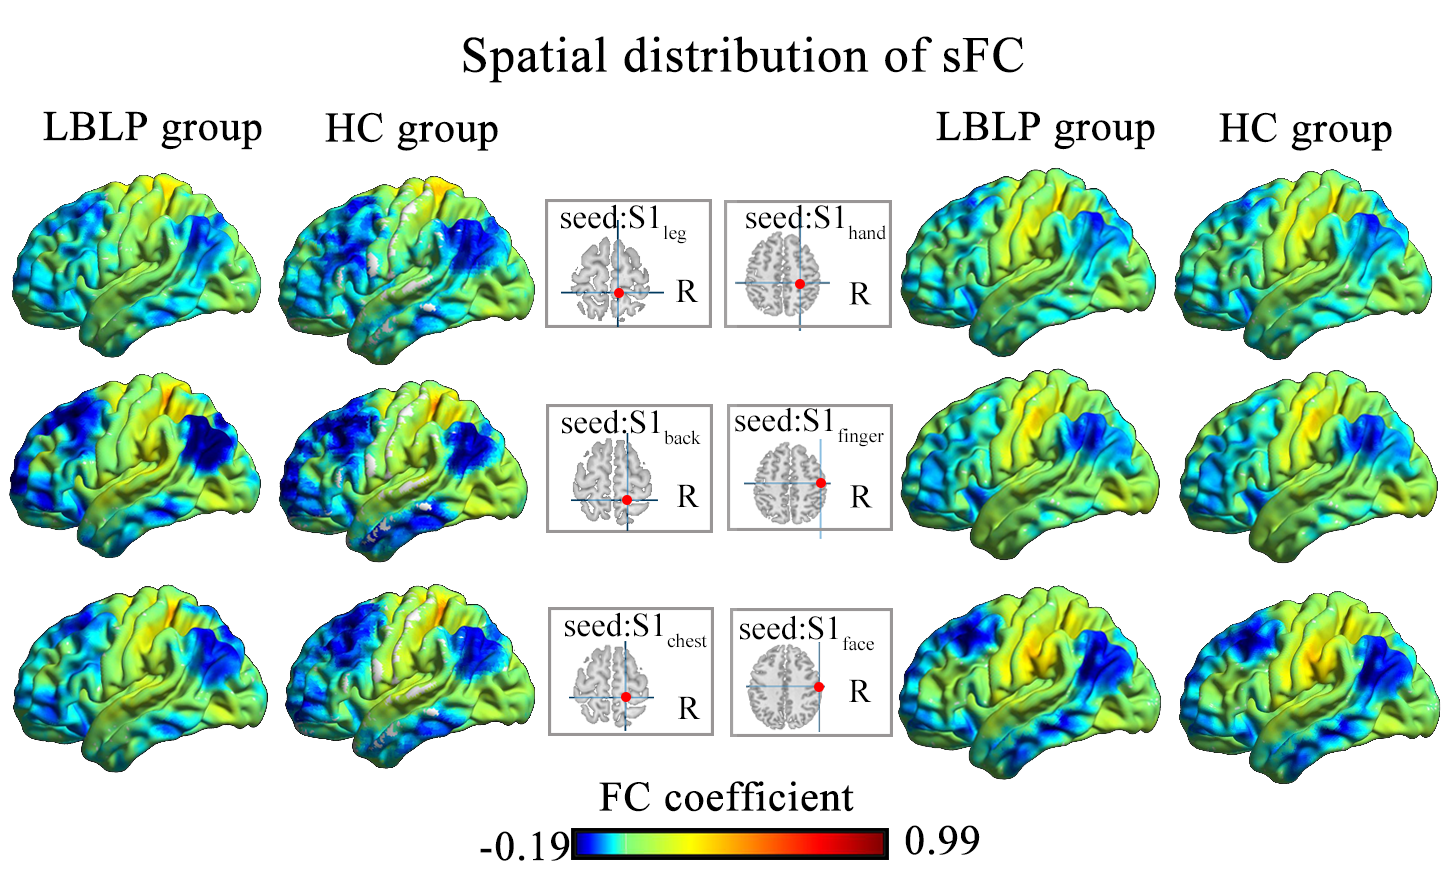
*

Figure S1. Static connectivity spatial distributions were observed at the group level for LBLP patients and healthy subjects (the somatotopic S1 subregions of right). sFC, static functional connectivity; S1, primary somatosensory cortex; LBLP, low-back-related leg pain; HCs, healthy controls*.*
